# Supplementary material for: Crystalline solid retains memory of anisotropy in precursor liquid crystalline phase
Source: Royal Society of Chemistry journal article supplement (doi:10.1039/d3tc01175e), 2023-01-01
Supplement: d3tc01175e1.pdf [file d3tc01175e1.pdf]

Captions for Video: **In-plane rotation of biaxially aligned HAT6**. A 70 nm film is aligned in microchannels and the intensity with in-plane rotation is observed. While there is no change in the background intensity, in the patterned region significant change in intensity is observed with sample rotation. Microscopy is performed at room temperature. The pitch and width of the channels are  $\approx 5 \mu\text{m}$  and  $3 \mu\text{m}$ , respectively.
